# Supplementary material for: Identification of HYPK-Interacting Proteins Reveals Involvement of HYPK in Regulating Cell Growth, Cell Cycle, Unfolded Protein Response and Cell Death
Source: PubMed Central journal article supplement (PMC3525516; doi:10.1371/journal.pone.0051415), 2012-12-10

Supplementary Figure S4: MOWSE score distribution (A), parental MS (B) and MS/MS (C) spectra for NME2

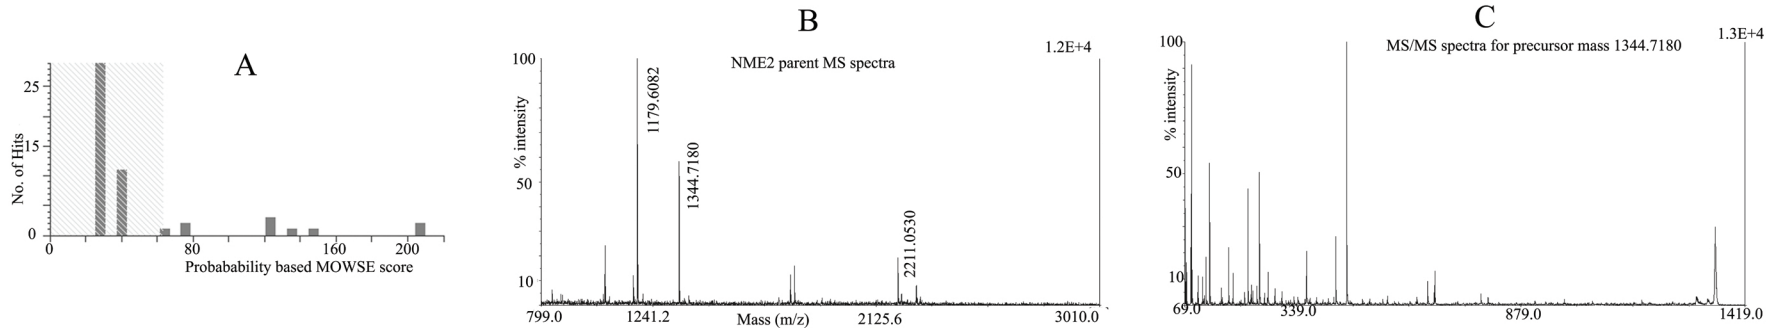

Supplement: pone.0051415.s004.pdf [file pone.0051415.s004.pdf]
