# Supplementary material for: Identification of HYPK-Interacting Proteins Reveals Involvement of HYPK in Regulating Cell Growth, Cell Cycle, Unfolded Protein Response and Cell Death
Source: PubMed Central journal article supplement (PMC3525516; doi:10.1371/journal.pone.0051415), 2012-12-10

**Supplementary Figure S6: Validation of interaction of HTT interacting proteins with HYPK by co-immunoprecipitation and confocal imaging studies**

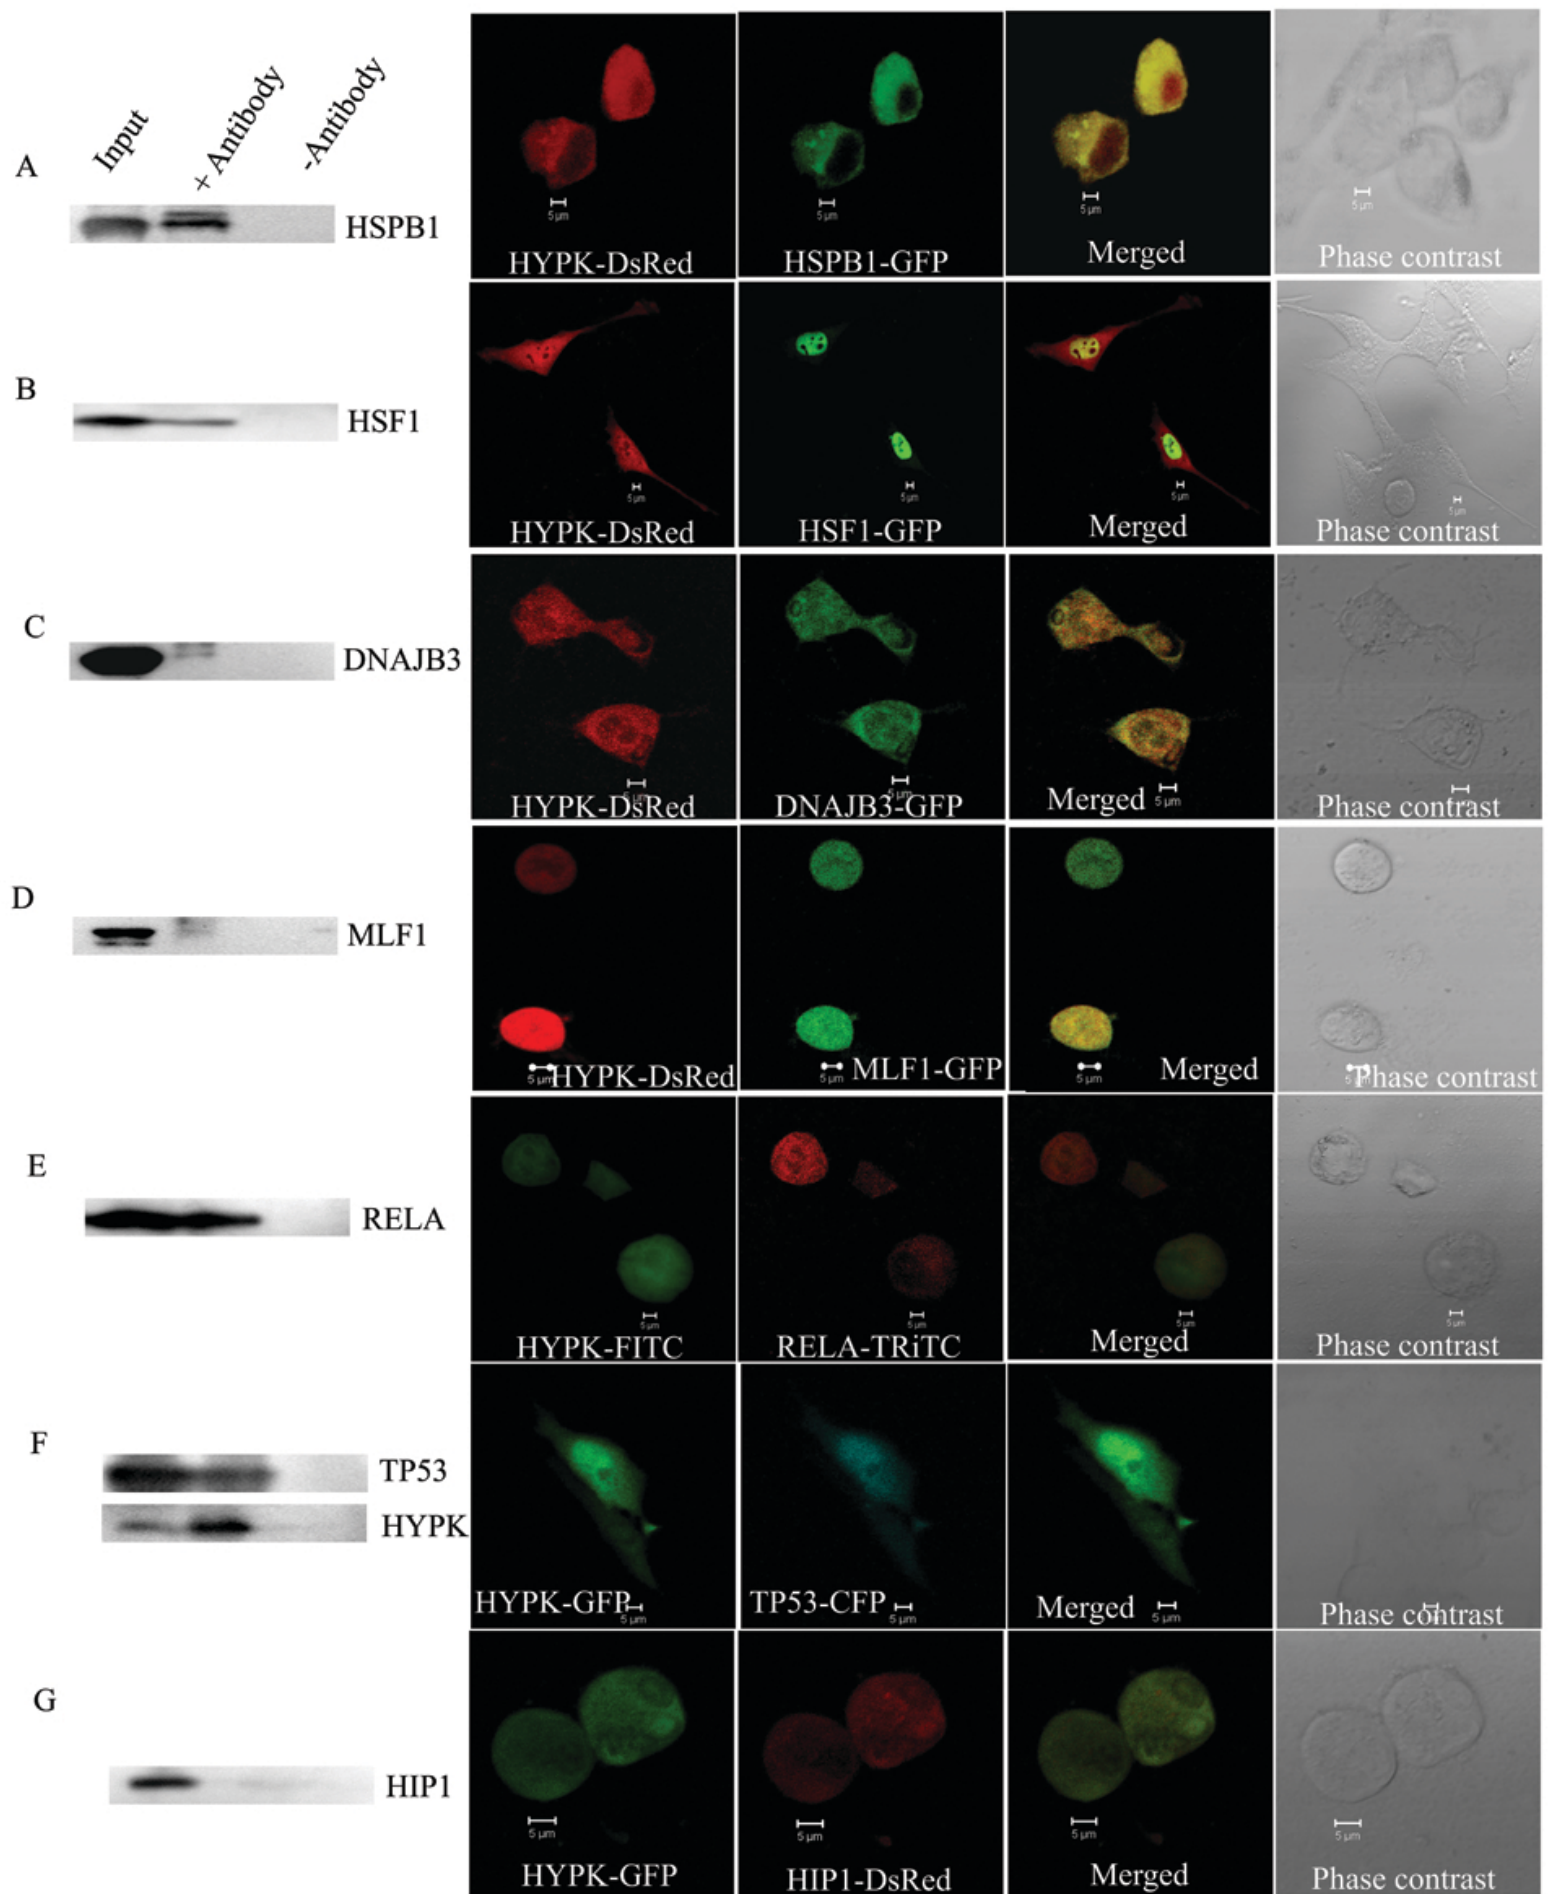

Supplement: pone.0051415.s006.pdf [file pone.0051415.s006.pdf]
