# Supplementary material for: Identification of HYPK-Interacting Proteins Reveals Involvement of HYPK in Regulating Cell Growth, Cell Cycle, Unfolded Protein Response and Cell Death
Source: PubMed Central journal article supplement (PMC3525516; doi:10.1371/journal.pone.0051415), 2012-12-10
Supplement: pone.0051415.s007.pdf [file pone.0051415.s007.pdf]

## **Supplementary Table S1:**

### *Details of used antibodies*

| <b>Antibodies used</b>                           | <b>Source</b>                                                                                                                             | <b>Used in</b>                                              |
|--------------------------------------------------|-------------------------------------------------------------------------------------------------------------------------------------------|-------------------------------------------------------------|
| Mouse anti-EF1 $\alpha$                          | Upstate, Cat no. 05-235                                                                                                                   | Co-immunoprecipitation and Native-PAGE                      |
| Mouse anti-Hsp70                                 | Abcam monoclonal, Cat. no. ab6535                                                                                                         | Co-immunoprecipitation and Native-PAGE                      |
| Rabbit anti-Hsp27                                | Abcam polyclonal, Cat. no. ab12351                                                                                                        | Co-immunoprecipitation                                      |
| Rabbit anti-DsRedC1                              | Clontech polyclonal, Cat. no. 632496                                                                                                      | Co-immunoprecipitation                                      |
| Mouse anti-NF $\kappa$ B against the p65 subunit | Millipore monoclonal, Cat. no. MAB3026                                                                                                    | Co-immunoprecipitation, Immunocytochemistry and Native-PAGE |
| Mouse anti-p53                                   | Imgenex monoclonal, Cat. no. IMG-80061                                                                                                    | Co-immunoprecipitation and Native-PAGE                      |
| Mouse anti-GFPC1                                 | Clontech monoclonal, Cat. No. 632375                                                                                                      | Co-immunoprecipitation                                      |
| Mouse anti-HIP1                                  | Novus Biologicals, Cat no. NB300-204, 1B11                                                                                                | Co-immunoprecipitation                                      |
| Rabbit anti-HYPK                                 | Anti-HYPK polyclonal antibody was custom made by providing purified HYPK protein to Imgenex Biotech Pvt. Ltd, India, polyclonal, CP 40 07 | Co-immunoprecipitation, Native PAGE, Immunocytochemistry    |
| Mouse anti-LaminB2                               | Abcam monoclonal, Cat. no. ab8983                                                                                                         | Co-immunoprecipitation, Native PAGE                         |
| Mouse anti-HTT (clone 1HU-4C8)                   | Millipore monoclonal, Cat. no. MAB2166)                                                                                                   | Co-immunoprecipitation, Native PAGE                         |

|                                                                                 |                                           |                                        |
|---------------------------------------------------------------------------------|-------------------------------------------|----------------------------------------|
| Anti-mouse secondary antibody (conjugated with TRiTC, excitation maxima 541 nm) | Bangalore Genei,<br>Cat no. 106008        | Immunocytochemistry                    |
| Anti-rabbit secondary antibody (conjugated with FITC, excitation maxima 494 nm) | Bangalore Genei, India,<br>Cat no. 10547  | Immunocytochemistry                    |
| Goat Anti-Mouse IgG HRP conjugate                                               | Bangalore Genei, India,<br>Cat no. 105502 | Secondary antibody in Western Blotting |
| Goat Anti-Rabbit IgG HRP conjugate                                              | Bangalore Genei, India,<br>Cat no. 105499 | Secondary antibody in Western Blotting |
