# Supplementary material for: Identification of HYPK-Interacting Proteins Reveals Involvement of HYPK in Regulating Cell Growth, Cell Cycle, Unfolded Protein Response and Cell Death
Source: PubMed Central journal article supplement (PMC3525516; doi:10.1371/journal.pone.0051415), 2012-12-10
Supplement: pone.0051415.s008.pdf [file pone.0051415.s008.pdf]

**Supplementary Table S2: Primer sequences and constructs used in this study**

**Supplementary Table S2A: Cloning of HYPK-interacting protein-coding genes in mammalian expression vectors, HYPK antisense strand in pU6.1 RNA/Hygro vector & Mus musculus HYPK expression primers**

| GENE                                  | VECTOR             | SEQUENCE OF FORWARD PRIMER                                    | RESTRICTION ENZYME SITE IN FORWARD ADAPTOR SEQUENCE | SEQUENCE OF REVERSE PRIMER                                   | RESTRICTION ENZYME SITE IN REVERSE ADAPTOR SEQUENCE |
|---------------------------------------|--------------------|---------------------------------------------------------------|-----------------------------------------------------|--------------------------------------------------------------|-----------------------------------------------------|
| HSPA8                                 | DsRed-C1           | 5'-<br><u>ACGCGTCGACGTCAAGG</u><br>GACCTGCAGTTGGTA-3'         | Sall                                                | 5'-<br><u>CGGGATCCTTAATC</u><br>AACCTCTTCAATGG<br>TG-3'      | BamHI                                               |
| CALM1                                 | DsRed-C1           | 5'-<br><u>ACGCGTCGACGTATGGCT</u><br>GATCAGCTGACTGAAGA<br>G-3' | Sall                                                | 5'-<br><u>CGGGATCCTCATT</u><br>TGCAGTCATCATCT<br>GT-3'       | BamHI                                               |
| LMNB2                                 | DsRed-C1           | 5'-<br><u>ACGCGTCGACATGGCCAC</u><br>GCCGCTG-3'                | Sall                                                | 5'-<br><u>CGGGATCCTCACAT</u><br>CACGTAGCAGCCTC<br>T-3'       | BamHI                                               |
| VIM                                   | DsRed-C1           | 5'-<br><u>ACGCGTCGACGTGTCCAC</u><br>CAGGTCCGTGTC -3'          | Sall                                                | 5'-<br><u>CGGGATCCTTCTCA</u><br>GCATCACGATGACC<br>-3'        | BamHI                                               |
| Antisense<br>HYPK                     | pU6.1<br>RNA/Hygro | 5'-<br><u>CGGGATCCTAGGGCAAT</u><br>AAGAGCCTCCA-3'             | BamHI                                               | 5'-<br><u>CCCAAGCTTTTTTTT</u><br>GGAGATCTCTCGAG<br>CAGCAG-3' | HindIII                                             |
| <b>EXPRESSION PRIMERS</b>             |                    |                                                               |                                                     |                                                              |                                                     |
| Mouse<br>HYPK<br>expression<br>primer | N/A                | 5'-<br>GCGGTGAGATCGAAAT<br>GG-3'                              | N/A                                                 | 5'-<br>TCAGTTGGTTAGGG<br>CAATAAGA-3'                         | N/A                                                 |

**Supplementary Table S2B: Summary & sources of the constructs used in this study**

| <b>GENE CLONED</b> | <b>VECTOR(S)</b>    | <b>DESIGNATION</b>          | <b>SOURCES</b>                                                                   |
|--------------------|---------------------|-----------------------------|----------------------------------------------------------------------------------|
| HSPA8              | pECFP-C1, pDsRed-C1 | HSPA8-CFP,<br>HSPA8-DsRed   | Present Study                                                                    |
| CALM1              | pEGFP-C1, pDsRed-C1 | CALM1-GFP,<br>CALM1-DsRed   | Present Study                                                                    |
| LMNB2              | pDsRed-C1           | LMNB2-DsRed                 | Present Study                                                                    |
| VIM                | pDsRed-C1           | VIM-DsRed                   | Present Study                                                                    |
| HYPK               | pEGFP-C1, pDsRed-C1 | HYPK-GFP,<br>HYPK-DsRed     | Swasti Raychaudhuri et al.,<br>Human Molecular Genetics, 2008, 17(2):<br>240–255 |
| EEF1A1             | pDsRed-C1, pEGFP-C1 | EEF1A1-DsRed,<br>EEF1A1-GFP | Swasti Raychaudhuri, Srijit Das and N.P.<br>Bhattacharyya, Unpublished data      |
| HSPA1A             | pEGFP-C1            | HSPA1A-GFP                  | Swasti Raychaudhuri and N.P.<br>Bhattacharyya, Unpublished data                  |
| HSPB1              | pEGFP-C1            | HSPB1-GFP                   | Kindly gifted by Dr. Nihar Ranjan Jana,<br>National Brain Research Centre, India |
| DNAJB3             | pEGFP-C1            | DNAJB3-GFP                  | Manisha Banerjee and N.P. Bhattacharyya,<br>Unpublished data                     |
| MLF1               | pEGFP-C1            | MLF1-GFP                    | Manisha Banerjee and N.P. Bhattacharyya,<br>Unpublished data                     |
| MLF2               | pEGFP-C1            | MLF2-GFP                    | Manisha Banerjee and N.P. Bhattacharyya,<br>Unpublished data                     |
| HIP1               | pDsRed-C1           | HIP1-DsRed                  | Manisha Banerjee and N.P. Bhattacharyya,<br>Unpublished data                     |
| TP53               | pECFP-C1            | TP53-CFP                    | Jayeeta Ghose et al.,<br>PLoS One. 2011;6(8):e23837                              |
| HSF1               | pEGFP-C1            | HSF1-GFP                    | Srijit Das and N.P. Bhattacharyya,<br>Unpublished data                           |
| Antisense HYPK     | pU6.1-RNA/Hygro     | HYPK-U61                    | Present Study                                                                    |
