# Supplementary material for: Identification of HYPK-Interacting Proteins Reveals Involvement of HYPK in Regulating Cell Growth, Cell Cycle, Unfolded Protein Response and Cell Death
Source: PubMed Central journal article supplement (PMC3525516; doi:10.1371/journal.pone.0051415), 2012-12-10
Supplement: pone.0051415.s009.pdf [file pone.0051415.s009.pdf]

**Supplementary Table S3: Details of MALDI analysis for the identification of HYPK interacting proteins**

| <b>HUGO name of interacting partner</b> | <b>Score</b> | <b>Mol.Mass (kDa)</b> | <b>pI</b> | <b>Peptides matched</b> | <b>%Sequence coverage</b> |
|-----------------------------------------|--------------|-----------------------|-----------|-------------------------|---------------------------|
| HSPA8                                   | 181          | 64.633                | 5.36      | 43                      | 54                        |
| LMNB2                                   | 56           | 43.34                 | 9.17      | 25                      | 59                        |
| CALM1                                   | 67           | 17.15                 | 4.06      | 10                      | 72                        |
| EEF1A1                                  | 63           | 50.09                 | 9.1       | 11                      | 20                        |
| LBR                                     | 69           | 10                    | 10.32     | 5                       | 56                        |
| ARCN1                                   | 66           | 57.17                 | 5.89      | 34                      | 46                        |
| TPI1                                    | 40           | 26.93                 | 8.21      | 24                      | 60                        |
| LENG8                                   | 64           | 88.1                  | 9.24      | 25                      | 27                        |
| SDCCAG1                                 | 40           | 23.82                 | 7.66      | 28                      | 52                        |
| IKBIP                                   | 47           | 39.29                 | 9.21      | 17                      | 30                        |
| CDH11                                   | 53           | 66.72                 | 4.75      | 18                      | 39                        |
| CALR                                    | 70           | 46.89                 | 4.3       | 17                      | 47                        |
| CEP290                                  | 71           | 29.02                 | 5.76      | 59                      | 42                        |
| HSP90AB1                                | 139          | 83.21                 | 4.97      | 32                      | 34                        |
| MYOM3                                   | 64           | 131.39                | 5.49      | 20                      | 16                        |
| ZNF462                                  | 67           | 119.53                | 6.07      | 39                      | 61                        |
| ZNF516                                  | 57           | 124.21                | 9.02      | 33                      | 28                        |
| ZNF100                                  | 68           | 63                    | 9.14      | 23                      | 45                        |
| KIF20B                                  | 62           | 210.43                | 5.55      | 48                      | 22                        |
| PGAM1                                   | 63           | 28.79                 | 6.67      | 11                      | 37                        |
| NME2                                    | 276          | 17.29                 | 8.52      | 26                      | 70                        |
| GLUD1                                   | 133          | 61.7                  | 7.66      | 45                      | 49                        |
| GLUD2                                   | 103          | 61.74                 | 8.63      | 36                      | 44                        |
| N4BP1                                   | 63           | 100.97                | 5.24      | 25                      | 46                        |
| ATP6V0A4                                | 59           | 96.35                 | 6.02      | 25                      | 28                        |
| SRRT                                    | 52           | 100.14                | 5.61      | 20                      | 29                        |
| PPP6R2                                  | 62           | 23.03                 | 4.02      | 14                      | 36                        |
| MAVS                                    | 61           | 56.49                 | 4.36      | 4                       | 36                        |
