# Supplementary material for: Identification of HYPK-Interacting Proteins Reveals Involvement of HYPK in Regulating Cell Growth, Cell Cycle, Unfolded Protein Response and Cell Death
Source: PubMed Central journal article supplement (PMC3525516; doi:10.1371/journal.pone.0051415), 2012-12-10
Supplement: pone.0051415.s010.pdf [file pone.0051415.s010.pdf]

**Supplementary Table S4: Involvement of 49 HYPK-interacting partners in various Molecular Functions, Biological Processes and Pathways**

**Supplementary Table S4A: Enrichment of 47 Molecular Functions (MF) with 49 HYPK-interacting proteins**

| GO terms (MF) | Annotations                                     | Genes    | S      | TS          | Hyp       | Hyp_c     | Genes                                                                                                                                                               |
|---------------|-------------------------------------------------|----------|--------|-------------|-----------|-----------|---------------------------------------------------------------------------------------------------------------------------------------------------------------------|
| GO:0005515    | protein binding (MF)                            | 29 genes | 29(45) | 6618(29095) | 2.67 E-09 | 2.35E-07  | ARCN1,TPI1,CHD3,RELA,HSF1,ATP6V0A4,RBPMS,TP53,TH1L,HSP90AB1,HTT,MDFI,PSME3,QKI,HSPA8,GLUD1,RHOXF2,MLF1,VIM,CDH11,LBR,LENG8,SRRT,MLF2,CEP290,EEF1A1,CALR,IKBIP,HSPB1 |
| GO:0004352    | glutamate dehydrogenase activity (MF)           | 2 genes  | 2(45)  | 2(29095)    | 2.34 E-06 | 5.15E-05  | GLUD2,GLUD1                                                                                                                                                         |
| GO:0004353    | glutamate dehydrogenase [NAD(P)+] activity (MF) | 2 genes  | 2(45)  | 2(29095)    | 2.34 E-06 | 5.15E-05  | GLUD2,GLUD1                                                                                                                                                         |
| GO:00070728   | leucine binding (MF)                            | 2 genes  | 2(45)  | 2(29095)    | 2.34 E-06 | 5.15E-05  | GLUD2,GLUD1                                                                                                                                                         |
| GO:00051082   | unfolded protein binding (MF)                   | 4 genes  | 4(45)  | 111(29095)  | 2.65 E-05 | 0.0004663 | DNAJC2,HSP90AB1,HSPA8,CALR                                                                                                                                          |
| GO:0003677    | DNA binding (MF)                                | 10 genes | 10(45) | 1454(29095) | 6.04 E-05 | 0.0008863 | ZNF462,CHD3,RELA,TP53,DNAJC2,MLF1,LBR,ZNF516,ZNF100,CALR                                                                                                            |
| GO:00043531   | ADP binding (MF)                                | 2 genes  | 2(45)  | 19(29095)   | 0.0003933 | 0.0049448 | GLUD2,GLUD1                                                                                                                                                         |
| GO:00019901   | protein kinase binding (MF)                     | 3 genes  | 3(45)  | 112(29095)  | 0.0007004 | 0.0077044 | PGAM1,RELA,VIM                                                                                                                                                      |
| GO:00051087   | chaperone binding (MF)                          | 2 genes  | 2(45)  | 29(29095)   | 0.0009248 | 0.009042  | TP53,CALR                                                                                                                                                           |
| GO:0004807    | triose-phosphate isomerase activity (MF)        | 1 gene   | 1(45)  | 1(29095)    | 0.0015467 | 0.0104697 | TPI1                                                                                                                                                                |
| GO:00050809   | diazepam binding (MF)                           | 1 gene   | 1(45)  | 1(29095)    | 0.0015467 | 0.0104697 | HTT                                                                                                                                                                 |
| GO:00051011   | microtubule minus-end binding (MF)              | 1 gene   | 1(45)  | 1(29095)    | 0.0015467 | 0.0104697 | CEP290                                                                                                                                                              |
| GO:00051183   | vitamin transporter activity (MF)               | 1 gene   | 1(45)  | 1(29095)    | 0.0015467 | 0.0104697 | GC                                                                                                                                                                  |
| GO:00042802   | identical protein binding (MF)                  | 4 genes  | 4(45)  | 336(29095)  | 0.0017925 | 0.0112669 | RELA,PSME3,GLUD1,HSPB1                                                                                                                                              |
| GO:00050613   | delta14-sterol reductase activity (MF)          | 1 gene   | 1(45)  | 2(29095)    | 0.003091  | 0.0181337 | LBR                                                                                                                                                                 |
| GO:00010843   | promoter binding (MF)                           | 2 genes  | 2(45)  | 77(29095)   | 0.0063581 | 0.0223803 | RELA,TP53                                                                                                                                                           |
| GO:00016563   | transcription activator activity (MF)           | 3 genes  | 3(45)  | 221(29095)  | 0.0048505 | 0.0224653 | RELA,TP53,CEP290                                                                                                                                                    |
| GO:000        | DNA strand                                      | 1 gene   | 1(45)  | 4(29095)    | 0.006     | 0.0226329 | TP53                                                                                                                                                                |

|            |                                                                    |         |       |             |               |           |                                                      |
|------------|--------------------------------------------------------------------|---------|-------|-------------|---------------|-----------|------------------------------------------------------|
| 00739      | annealing activity (MF)                                            |         |       |             | 1726          |           |                                                      |
| GO:0004082 | bisphosphoglycerate mutase activity (MF)                           | 1 gene  | 1(45) | 4(29095)    | 0.006<br>1726 | 0.0226329 | PGAM1                                                |
| GO:0004083 | 2,3-bisphospho-D-glycerate 2-phosphohydrolase activity (MF)        | 1 gene  | 1(45) | 4(29095)    | 0.006<br>1726 | 0.0226329 | PGAM1                                                |
| GO:0004619 | phosphoglycerate mutase activity (MF)                              | 1 gene  | 1(45) | 4(29095)    | 0.006<br>1726 | 0.0226329 | PGAM1                                                |
| GO:0001849 | complement component C1q binding (MF)                              | 1 gene  | 1(45) | 3(29095)    | 0.004<br>633  | 0.02265   | CALR                                                 |
| GO:0003091 | TPR domain binding (MF)                                            | 1 gene  | 1(45) | 3(29095)    | 0.004<br>633  | 0.02265   | HSP90AB1                                             |
| GO:0007021 | MDM2 binding (MF)                                                  | 1 gene  | 1(45) | 3(29095)    | 0.004<br>633  | 0.02265   | PSME3                                                |
| GO:0005524 | ATP binding (MF)                                                   | 7 genes | 7(45) | 1467(29095) | 0.006<br>9006 | 0.0233558 | CHD3,TP53,HSP90AB1,HSPA8,GLUD1,KIF20B,HSPA14         |
| GO:0005499 | vitamin D binding (MF)                                             | 1 gene  | 1(45) | 5(29095)    | 0.007<br>7099 | 0.0233957 | GC                                                   |
| GO:0008538 | proteasome activator activity (MF)                                 | 1 gene  | 1(45) | 5(29095)    | 0.007<br>7099 | 0.0233957 | PSME3                                                |
| GO:0003023 | nitric-oxide synthase regulator activity (MF)                      | 1 gene  | 1(45) | 5(29095)    | 0.007<br>7099 | 0.0233957 | HSP90AB1                                             |
| GO:0004748 | protein N-terminus binding (MF)                                    | 2 genes | 2(45) | 73(29095)   | 0.005<br>7329 | 0.0252248 | RELA,TP53                                            |
| GO:0005521 | lamin binding (MF)                                                 | 1 gene  | 1(45) | 6(29095)    | 0.009<br>2449 | 0.0254236 | LBR                                                  |
| GO:0007007 | chromo shadow domain binding (MF)                                  | 1 gene  | 1(45) | 6(29095)    | 0.009<br>2449 | 0.0254236 | LBR                                                  |
| GO:0000166 | nucleotide binding (MF)                                            | 8 genes | 8(45) | 1928(29095) | 0.008<br>7422 | 0.0256438 | CHD3,RBPMS,HSP90AB1,HSPA8,GLUD1,KIF20B,HSPA14,EEF1A1 |
| GO:0008553 | hydrogen-exporting ATPase activity, phosphorylative mechanism (MF) | 1 gene  | 1(45) | 7(29095)    | 0.010<br>7776 | 0.0287403 | ATP6V0A4                                             |
| GO:0001683 | isomerase activity (MF)                                            | 2 genes | 2(45) | 106(29095)  | 0.011<br>7546 | 0.0304237 | PGAM1,TPI1                                           |
| GO:0003361 | transcription activator binding (MF)                               | 1 gene  | 1(45) | 8(29095)    | 0.012<br>308  | 0.0309457 | RELA                                                 |
| GO:0000814 | poly(A) RNA binding (MF)                                           | 1 gene  | 1(45) | 9(29095)    | 0.013<br>836  | 0.0338213 | RBPMS                                                |
| GO:0004263 | ATPase activity, coupled (MF)                                      | 1 gene  | 1(45) | 10(29095)   | 0.015<br>3617 | 0.0355745 | HSPA8                                                |

|            |                                         |         |       |            |           |           |                    |
|------------|-----------------------------------------|---------|-------|------------|-----------|-----------|--------------------|
| GO:0070403 | NAD binding (MF)                        | 1 gene  | 1(45) | 10(29095)  | 0.0153617 | 0.0355745 | GLUD1              |
| GO:0005525 | GTP binding (MF)                        | 3 genes | 3(45) | 365(29095) | 0.0188377 | 0.0404321 | GLUD2,GLUD1,EEF1A1 |
| GO:0005246 | calcium channel regulator activity (MF) | 1 gene  | 1(45) | 12(29095)  | 0.0184063 | 0.0404938 | HTT                |
| GO:0070491 | transcription repressor binding (MF)    | 1 gene  | 1(45) | 12(29095)  | 0.0184063 | 0.0404938 | RELA               |
| GO:0003682 | chromatin binding (MF)                  | 2 genes | 2(45) | 139(29095) | 0.0196177 | 0.0411037 | CHD3,TP53          |
| GO:0051117 | ATPase binding (MF)                     | 1 gene  | 1(45) | 14(29095)  | 0.0214416 | 0.0438805 | ATP6V0A4           |
| GO:0008134 | transcription factor binding (MF)       | 2 genes | 2(45) | 153(29095) | 0.0234629 | 0.0448855 | RELA,TP53          |
| GO:0042301 | phosphate binding (MF)                  | 1 gene  | 1(45) | 15(29095)  | 0.0229558 | 0.0448914 | RELA               |
| GO:0051059 | NF-kappaB binding (MF)                  | 1 gene  | 1(45) | 15(29095)  | 0.0229558 | 0.0448914 | RELA               |

**Supplementary Table S4B: Enrichment of 135 Biological Processes (BP) with 49 HYPK-interacting partners**

| Annotations                                                    | Items      | Genes   | S     | TS         | Hyp      | Hyp_c  | Genes                         |
|----------------------------------------------------------------|------------|---------|-------|------------|----------|--------|-------------------------------|
| glutamate deamidation (BP)                                     | GO:0019459 | 2 genes | 2(45) | 2(29095)   | 2.34E-06 | 0.0006 | GLUD2, GLUD1                  |
| glutamate biosynthetic process (BP)                            | GO:0006537 | 2 genes | 2(45) | 5(29095)   | 2.33E-05 | 0.0019 | GLUD2, GLUD1                  |
| cell cycle arrest (BP)                                         | GO:0007050 | 4 genes | 4(45) | 106(29095) | 2.21E-05 | 0.0027 | TP53, MLF1, KIF20B, CALR      |
| negative regulation of DNA binding (BP)                        | GO:0043392 | 2 genes | 2(45) | 9(29095)   | 8.36E-05 | 0.0034 | ZNF462, MDFI                  |
| regulation of mitochondrial membrane permeability (BP)         | GO:0046902 | 2 genes | 2(45) | 10(29095)  | 0.000104 | 0.0037 | TP53, HTT                     |
| response to unfolded protein (BP)                              | GO:0006986 | 3 genes | 3(45) | 50(29095)  | 6.44E-05 | 0.0039 | HSP90AB1, HSPA8, HSPB1        |
| protein folding (BP)                                           | GO:0006457 | 4 genes | 4(45) | 149(29095) | 8.36E-05 | 0.0041 | DNAJC2, HSP90AB1, HSPA8, CALR |
| embryonic development (BP)                                     | GO:0009790 | 3 genes | 3(45) | 69(29095)  | 0.000169 | 0.0052 | TPI1, HTT, MDFI               |
| gastrulation (BP)                                              | GO:0007369 | 2 genes | 2(45) | 15(29095)  | 0.000242 | 0.0059 | TP53, HTT                     |
| response to X-ray (BP)                                         | GO:0010165 | 2 genes | 2(45) | 15(29095)  | 0.000242 | 0.0059 | TP53, IKBIP                   |
| cell aging (BP)                                                | GO:0007569 | 2 genes | 2(45) | 27(29095)  | 0.000801 | 0.0164 | TP53, HTT                     |
| regulation of apoptosis (BP)                                   | GO:0042981 | 3 genes | 3(45) | 114(29095) | 0.000737 | 0.0164 | TP53, PSME3, CALR             |
| citrulline metabolic process (BP)                              | GO:0000052 | 1 gene  | 1(45) | 1(29095)   | 0.001547 | 0.0172 | HTT                           |
| peptide antigen assembly with MHC class I protein complex (BP) | GO:0002502 | 1 gene  | 1(45) | 1(29095)   | 0.001547 | 0.0172 | CALR                          |
| positive regulation of Schwann cell differentiation (BP)       | GO:0014040 | 1 gene  | 1(45) | 1(29095)   | 0.001547 | 0.0172 | RELA                          |
| lactate biosynthetic process from pyruvate (BP)                | GO:0019244 | 1 gene  | 1(45) | 1(29095)   | 0.001547 | 0.0172 | HTT                           |
| olfactory lobe development (BP)                                | GO:0021988 | 1 gene  | 1(45) | 1(29095)   | 0.001547 | 0.0172 | HTT                           |
| neural plate formation (BP)                                    | GO:0021990 | 1 gene  | 1(45) | 1(29095)   | 0.001547 | 0.0172 | HTT                           |
| regulation of pentose-phosphate shunt (BP)                     | GO:0043456 | 1 gene  | 1(45) | 1(29095)   | 0.001547 | 0.0172 | PGAM1                         |
| pronephros development (BP)                                    | GO:0048793 | 1 gene  | 1(45) | 1(29095)   | 0.001547 | 0.0172 | CEP290                        |
| vitamin transport (BP)                                         | GO:0051180 | 1 gene  | 1(45) | 1(29095)   | 0.001547 | 0.0172 | GC                            |
| cellular amino acid metabolic process (BP)                     | GO:0006520 | 2 genes | 2(45) | 40(29095)  | 0.001758 | 0.0187 | GLUD2, GLUD1                  |
| regulation of cell cycle (BP)                                  | GO:0051726 | 2 genes | 2(45) | 42(29095)  | 0.001936 | 0.0198 | TP53, HSPA8                   |
| T cell proliferation during immune response (BP)               | GO:0002309 | 1 gene  | 1(45) | 2(29095)   | 0.003091 | 0.0205 | TP53                          |
| glutamate catabolic process (BP)                               | GO:0006538 | 1 gene  | 1(45) | 2(29095)   | 0.003091 | 0.0205 | GLUD1                         |

|                                                                                       |            |         |       |            |          |        |                     |
|---------------------------------------------------------------------------------------|------------|---------|-------|------------|----------|--------|---------------------|
| glyceraldehyde-3-phosphate metabolic process (BP)                                     | GO:0019682 | 1 gene  | 1(45) | 2(29095)   | 0.003091 | 0.0205 | TPI1                |
| negative regulation of steroid hormone receptor signaling pathway (BP)                | GO:0033144 | 1 gene  | 1(45) | 2(29095)   | 0.003091 | 0.0205 | CALR                |
| response to cobalamin (BP)                                                            | GO:0033590 | 1 gene  | 1(45) | 2(29095)   | 0.003091 | 0.0205 | RELA                |
| long-chain fatty acid biosynthetic process (BP)                                       | GO:0042759 | 1 gene  | 1(45) | 2(29095)   | 0.003091 | 0.0205 | QKI                 |
| intermediate filament-based process (BP)                                              | GO:0045103 | 1 gene  | 1(45) | 2(29095)   | 0.003091 | 0.0205 | VIM                 |
| negative regulation of helicase activity (BP)                                         | GO:0051097 | 1 gene  | 1(45) | 2(29095)   | 0.003091 | 0.0205 | TP53                |
| regulation of interferon-gamma-mediated signaling pathway (BP)                        | GO:0060334 | 1 gene  | 1(45) | 2(29095)   | 0.003091 | 0.0205 | HSP90AB1            |
| regulation of type I interferon-mediated signaling pathway (BP)                       | GO:0060338 | 1 gene  | 1(45) | 2(29095)   | 0.003091 | 0.0205 | HSP90AB1            |
| interspecies interaction between organisms (BP)                                       | GO:0044419 | 4 genes | 4(45) | 300(29095) | 0.001183 | 0.0223 | RELA,TP53,HSPA8,VIM |
| response to heat (BP)                                                                 | GO:0009408 | 2 genes | 2(45) | 46(29095)  | 0.002318 | 0.0227 | HSF1,HSPB1          |
| cellular membrane organization (BP)                                                   | GO:0016044 | 2 genes | 2(45) | 58(29095)  | 0.003659 | 0.0236 | ARCN1,HSPA8         |
| anti-apoptosis (BP)                                                                   | GO:0006916 | 3 genes | 3(45) | 182(29095) | 0.002817 | 0.0256 | RELA,HTT,HSPB1      |
| ossification (BP)                                                                     | GO:0001503 | 2 genes | 2(45) | 50(29095)  | 0.002733 | 0.0258 | ATP6V0A4,CDH11      |
| myeloid progenitor cell differentiation (BP)                                          | GO:0002318 | 1 gene  | 1(45) | 3(29095)   | 0.004633 | 0.0264 | MLF1                |
| response to tumor cell (BP)                                                           | GO:0002347 | 1 gene  | 1(45) | 3(29095)   | 0.004633 | 0.0264 | TP53                |
| quinolinate biosynthetic process (BP)                                                 | GO:0019805 | 1 gene  | 1(45) | 3(29095)   | 0.004633 | 0.0264 | HTT                 |
| otic vesicle formation (BP)                                                           | GO:0030916 | 1 gene  | 1(45) | 3(29095)   | 0.004633 | 0.0264 | CEP290              |
| sequestering of calcium ion (BP)                                                      | GO:0051208 | 1 gene  | 1(45) | 3(29095)   | 0.004633 | 0.0264 | CALR                |
| negative regulation of transcription from RNA polymerase II promoter (BP)             | GO:0000122 | 3 genes | 3(45) | 221(29095) | 0.00485  | 0.027  | TP53,MDFI,CALR      |
| response to lipopolysaccharide (BP)                                                   | GO:0032496 | 2 genes | 2(45) | 76(29095)  | 0.006199 | 0.0281 | RELA,HSF1           |
| regulation of glycolysis (BP)                                                         | GO:0006110 | 1 gene  | 1(45) | 4(29095)   | 0.006173 | 0.0285 | PGAM1               |
| embryonic development ending in birth or egg hatching (BP)                            | GO:0009792 | 1 gene  | 1(45) | 4(29095)   | 0.006173 | 0.0285 | TP53                |
| dorsal/ventral axis specification (BP)                                                | GO:0009950 | 1 gene  | 1(45) | 4(29095)   | 0.006173 | 0.0285 | MDFI                |
| negative regulation of proteasomal ubiquitin-dependent protein catabolic process (BP) | GO:0032435 | 1 gene  | 1(45) | 4(29095)   | 0.006173 | 0.0285 | HSP90AB1            |
| cellular response to glucose starvation (BP)                                          | GO:0042149 | 1 gene  | 1(45) | 4(29095)   | 0.006173 | 0.0285 | TP53                |
| L-glutamate import (BP)                                                               | GO:0051    | 1 gene  | 1(45) | 4(29095)   | 0.006173 | 0.0285 | HTT                 |

|                                                                               |            |         |       |             |          |        |                                   |
|-------------------------------------------------------------------------------|------------|---------|-------|-------------|----------|--------|-----------------------------------|
|                                                                               | 938        |         |       |             |          |        |                                   |
| nucleotide-binding oligomerization domain containing 2 signaling pathway (BP) | GO:0070431 | 1 gene  | 1(45) | 4(29095)    | 0.006173 | 0.0285 | RELA                              |
| M phase of mitotic cell cycle (BP)                                            | GO:0000087 | 1 gene  | 1(45) | 6(29095)    | 0.009245 | 0.0298 | KIF20B                            |
| pentose-phosphate shunt (BP)                                                  | GO:0006098 | 1 gene  | 1(45) | 6(29095)    | 0.009245 | 0.0298 | TPI1                              |
| negative regulation of neuroblast proliferation (BP)                          | GO:0007406 | 1 gene  | 1(45) | 6(29095)    | 0.009245 | 0.0298 | TP53                              |
| striatum development (BP)                                                     | GO:0021756 | 1 gene  | 1(45) | 6(29095)    | 0.009245 | 0.0298 | HTT                               |
| DNA damage response, signal transduction by p53 class mediator (BP)           | GO:0030330 | 1 gene  | 1(45) | 6(29095)    | 0.009245 | 0.0298 | TP53                              |
| G1/S DNA damage checkpoint (BP)                                               | GO:0031571 | 1 gene  | 1(45) | 6(29095)    | 0.009245 | 0.0298 | TP53                              |
| vitamin D metabolic process (BP)                                              | GO:0042359 | 1 gene  | 1(45) | 6(29095)    | 0.009245 | 0.0298 | GC                                |
| glucocorticoid receptor signaling pathway (BP)                                | GO:0042921 | 1 gene  | 1(45) | 6(29095)    | 0.009245 | 0.0298 | CALR                              |
| negative regulation of fibroblast proliferation (BP)                          | GO:0048147 | 1 gene  | 1(45) | 6(29095)    | 0.009245 | 0.0298 | TP53                              |
| negative regulation of retinoic acid receptor signaling pathway (BP)          | GO:0048387 | 1 gene  | 1(45) | 6(29095)    | 0.009245 | 0.0298 | CALR                              |
| embryonic process involved in female pregnancy (BP)                           | GO:0060136 | 1 gene  | 1(45) | 6(29095)    | 0.009245 | 0.0298 | HSF1                              |
| B cell lineage commitment (BP)                                                | GO:0002326 | 1 gene  | 1(45) | 5(29095)    | 0.00771  | 0.03   | TP53                              |
| T cell lineage commitment (BP)                                                | GO:0002360 | 1 gene  | 1(45) | 5(29095)    | 0.00771  | 0.03   | TP53                              |
| axon cargo transport (BP)                                                     | GO:0008088 | 1 gene  | 1(45) | 5(29095)    | 0.00771  | 0.03   | HTT                               |
| protein maturation by protein folding (BP)                                    | GO:0022417 | 1 gene  | 1(45) | 5(29095)    | 0.00771  | 0.03   | CALR                              |
| primary microRNA processing (BP)                                              | GO:0031053 | 1 gene  | 1(45) | 5(29095)    | 0.00771  | 0.03   | SRRT                              |
| cellular response to UV (BP)                                                  | GO:0034644 | 1 gene  | 1(45) | 5(29095)    | 0.00771  | 0.03   | TP53                              |
| regulation of meiosis (BP)                                                    | GO:0040020 | 1 gene  | 1(45) | 5(29095)    | 0.00771  | 0.03   | CALR                              |
| paraxial mesoderm formation (BP)                                              | GO:0048341 | 1 gene  | 1(45) | 5(29095)    | 0.00771  | 0.03   | HTT                               |
| iron ion homeostasis (BP)                                                     | GO:0055072 | 1 gene  | 1(45) | 5(29095)    | 0.00771  | 0.03   | HTT                               |
| regulation of transcription, DNA-dependent (BP)                               | GO:0006355 | 6 genes | 6(45) | 1063(29095) | 0.005656 | 0.0308 | CHD3,HSF1,TP53,RHOXF2,ZNF100,CALR |
| negative regulation of cell growth (BP)                                       | GO:0030308 | 2 genes | 2(45) | 88(29095)   | 0.008229 | 0.031  | TP53,DNAJC2                       |
| spermatogenesis (BP)                                                          | GO:0007283 | 3 genes | 3(45) | 267(29095)  | 0.008161 | 0.0312 | HSF1,HTT,QKI                      |
| defense response (BP)                                                         | GO:0006952 | 2 genes | 2(45) | 74(29095)   | 0.005886 | 0.0314 | HSF1,MLF2                         |
| G2 phase of mitotic cell                                                      | GO:0000    | 1 gene  | 1(45) | 7(29095)    | 0.010778 | 0.0314 | DNAJC2                            |

|                                                                                                                      |            |         |       |            |          |        |                  |
|----------------------------------------------------------------------------------------------------------------------|------------|---------|-------|------------|----------|--------|------------------|
| cycle (BP)                                                                                                           | 085        |         |       |            |          |        |                  |
| dopamine receptor signaling pathway (BP)                                                                             | GO:0007212 | 1 gene  | 1(45) | 7(29095)   | 0.010778 | 0.0314 | HTT              |
| response to salt stress (BP)                                                                                         | GO:0009651 | 1 gene  | 1(45) | 7(29095)   | 0.010778 | 0.0314 | TP53             |
| cytoplasmic sequestering of transcription factor (BP)                                                                | GO:0042994 | 1 gene  | 1(45) | 7(29095)   | 0.010778 | 0.0314 | MDFI             |
| positive regulation of interleukin-12 biosynthetic process (BP)                                                      | GO:0045084 | 1 gene  | 1(45) | 7(29095)   | 0.010778 | 0.0314 | RELA             |
| positive regulation of SMAD protein nuclear translocation (BP)                                                       | GO:0060391 | 1 gene  | 1(45) | 7(29095)   | 0.010778 | 0.0314 | RBPM5            |
| positive regulation of transcription from RNA polymerase II promoter (BP)                                            | GO:0045944 | 3 genes | 3(45) | 291(29095) | 0.010308 | 0.0328 | ZNF462,RELA,TP53 |
| cellular component movement (BP)                                                                                     | GO:0006928 | 2 genes | 2(45) | 101(29095) | 0.010719 | 0.0337 | VIM,HSPB1        |
| determination of adult lifespan (BP)                                                                                 | GO:0008340 | 1 gene  | 1(45) | 8(29095)   | 0.012308 | 0.0343 | HTT              |
| activation of caspase activity by cytochrome c (BP)                                                                  | GO:0008635 | 1 gene  | 1(45) | 8(29095)   | 0.012308 | 0.0343 | TP53             |
| response to UV-B (BP)                                                                                                | GO:0010224 | 1 gene  | 1(45) | 8(29095)   | 0.012308 | 0.0343 | RELA             |
| positive regulation of chondrocyte differentiation (BP)                                                              | GO:0032332 | 1 gene  | 1(45) | 8(29095)   | 0.012308 | 0.0343 | RELA             |
| urea cycle (BP)                                                                                                      | GO:0000050 | 1 gene  | 1(45) | 9(29095)   | 0.013836 | 0.0346 | HTT              |
| glutamate metabolic process (BP)                                                                                     | GO:0006536 | 1 gene  | 1(45) | 9(29095)   | 0.013836 | 0.0346 | GLUD2            |
| DNA damage response, signal transduction by p53 class mediator resulting in transcription of p21 class mediator (BP) | GO:0006978 | 1 gene  | 1(45) | 9(29095)   | 0.013836 | 0.0346 | TP53             |
| ER overload response (BP)                                                                                            | GO:0006983 | 1 gene  | 1(45) | 9(29095)   | 0.013836 | 0.0346 | TP53             |
| ATP hydrolysis coupled proton transport (BP)                                                                         | GO:0015991 | 1 gene  | 1(45) | 9(29095)   | 0.013836 | 0.0346 | ATP6V0A4         |
| negative regulation of protein catabolic process (BP)                                                                | GO:0042177 | 1 gene  | 1(45) | 9(29095)   | 0.013836 | 0.0346 | RELA             |
| muscle cell differentiation (BP)                                                                                     | GO:0042692 | 1 gene  | 1(45) | 9(29095)   | 0.013836 | 0.0346 | QKI              |
| response to arsenic (BP)                                                                                             | GO:0046685 | 1 gene  | 1(45) | 9(29095)   | 0.013836 | 0.0346 | SRRT             |
| vesicle transport along microtubule (BP)                                                                             | GO:0047496 | 1 gene  | 1(45) | 9(29095)   | 0.013836 | 0.0346 | HTT              |
| chaperone mediated protein folding requiring cofactor (BP)                                                           | GO:0051085 | 1 gene  | 1(45) | 9(29095)   | 0.013836 | 0.0346 | HSPA8            |
| organ morphogenesis (BP)                                                                                             | GO:0009887 | 2 genes | 2(45) | 120(29095) | 0.014877 | 0.0368 | RELA,HTT         |
| regulation of Wnt receptor signaling pathway (BP)                                                                    | GO:0030111 | 1 gene  | 1(45) | 10(29095)  | 0.015362 | 0.0369 | MDFI             |
| COPII coating of Golgi vesicle (BP)                                                                                  | GO:0048205 | 1 gene  | 1(45) | 10(29095)  | 0.015362 | 0.0369 | ARCN1            |

|                                                                                                         |            |        |       |           |          |        |        |
|---------------------------------------------------------------------------------------------------------|------------|--------|-------|-----------|----------|--------|--------|
| regulation of mitochondrial membrane potential (BP)                                                     | GO:0051881 | 1 gene | 1(45) | 10(29095) | 0.015362 | 0.0369 | HTT    |
| endoplasmic reticulum organization (BP)                                                                 | GO:0007029 | 1 gene | 1(45) | 11(29095) | 0.016885 | 0.039  | HTT    |
| membrane protein intracellular domain proteolysis (BP)                                                  | GO:0031293 | 1 gene | 1(45) | 11(29095) | 0.016885 | 0.039  | RELA   |
| negative regulation of tumor necrosis factor production (BP)                                            | GO:0032720 | 1 gene | 1(45) | 11(29095) | 0.016885 | 0.039  | HSF1   |
| protein tetramerization (BP)                                                                            | GO:0051262 | 1 gene | 1(45) | 11(29095) | 0.016885 | 0.039  | TP53   |
| regulation of mitosis (BP)                                                                              | GO:0007088 | 1 gene | 1(45) | 12(29095) | 0.018406 | 0.0406 | KIF20B |
| rRNA transcription (BP)                                                                                 | GO:0009303 | 1 gene | 1(45) | 12(29095) | 0.018406 | 0.0406 | TP53   |
| hormone metabolic process (BP)                                                                          | GO:0042445 | 1 gene | 1(45) | 12(29095) | 0.018406 | 0.0406 | HTT    |
| eye photoreceptor cell development (BP)                                                                 | GO:0042462 | 1 gene | 1(45) | 12(29095) | 0.018406 | 0.0406 | CEP290 |
| respiratory burst (BP)                                                                                  | GO:0045730 | 1 gene | 1(45) | 12(29095) | 0.018406 | 0.0406 | PGAM1  |
| hair follicle development (BP)                                                                          | GO:0001942 | 1 gene | 1(45) | 13(29095) | 0.019925 | 0.0424 | RELA   |
| associative learning (BP)                                                                               | GO:0008306 | 1 gene | 1(45) | 13(29095) | 0.019925 | 0.0424 | HTT    |
| cortical actin cytoskeleton organization (BP)                                                           | GO:0030866 | 1 gene | 1(45) | 13(29095) | 0.019925 | 0.0424 | CALR   |
| positive regulation of phagocytosis (BP)                                                                | GO:0050766 | 1 gene | 1(45) | 13(29095) | 0.019925 | 0.0424 | CALR   |
| senescence (BP)                                                                                         | GO:0010149 | 1 gene | 1(45) | 14(29095) | 0.021442 | 0.0431 | CALR   |
| hindbrain development (BP)                                                                              | GO:0030902 | 1(gene | 1(45) | 14(29095) | 0.021442 | 0.0431 | CEP290 |
| T cell differentiation in the thymus (BP)                                                               | GO:0033077 | 1 gene | 1(45) | 14(29095) | 0.021442 | 0.0431 | TP53   |
| DNA damage response, signal transduction by p53 class mediator resulting in induction of apoptosis (BP) | GO:0042771 | 1 gene | 1(45) | 14(29095) | 0.021442 | 0.0431 | TP53   |
| response to morphine (BP)                                                                               | GO:0043278 | 1 gene | 1(45) | 14(29095) | 0.021442 | 0.0431 | RELA   |
| positive regulation of cell cycle (BP)                                                                  | GO:0045787 | 1 gene | 1(45) | 14(29095) | 0.021442 | 0.0431 | CALR   |
| chromosome organization (BP)                                                                            | GO:0051276 | 1 gene | 1(45) | 14(29095) | 0.021442 | 0.0431 | TP53   |
| protein export from nucleus (BP)                                                                        | GO:0006611 | 1 gene | 1(45) | 15(29095) | 0.022956 | 0.045  | CALR   |
| induction of apoptosis by intracellular signals (BP)                                                    | GO:0008629 | 1 gene | 1(45) | 15(29095) | 0.022956 | 0.045  | TP53   |
| response to amino acid stimulus (BP)                                                                    | GO:0043200 | 1 gene | 1(45) | 15(29095) | 0.022956 | 0.045  | RELA   |
| response to inorganic substance (BP)                                                                    | GO:0010035 | 1 gene | 1(45) | 16(29095) | 0.024468 | 0.0465 | RELA   |
| positive regulation of pathway-restricted SMAD protein phosphorylation                                  | GO:0010862 | 1 gene | 1(45) | 16(29095) | 0.024468 | 0.0465 | RBPM5  |



|                                                                      |                |        |       |               |          |        |          |
|----------------------------------------------------------------------|----------------|--------|-------|---------------|----------|--------|----------|
| (BP)                                                                 |                |        |       |               |          |        |          |
| social behavior (BP)                                                 | GO:0035<br>176 | 1 gene | 1(45) | 16(2909<br>5) | 0.024468 | 0.0465 | HTT      |
| negative regulation of<br>insulin receptor signaling<br>pathway (BP) | GO:0046<br>627 | 1 gene | 1(45) | 16(2909<br>5) | 0.024468 | 0.0465 | RELA     |
| negative regulation of<br>DNA replication (BP)                       | GO:0008<br>156 | 1 gene | 1(45) | 17(2909<br>5) | 0.025977 | 0.0482 | TP53     |
| negative regulation of<br>translation (BP)                           | GO:0017<br>148 | 1 gene | 1(45) | 17(2909<br>5) | 0.025977 | 0.0482 | CALR     |
| positive regulation of<br>neuron apoptosis (BP)                      | GO:0043<br>525 | 1 gene | 1(45) | 17(2909<br>5) | 0.025977 | 0.0482 | TP53     |
| protein import into<br>nucleus, translocation (BP)                   | GO:0000<br>060 | 1 gene | 1(45) | 18(2909<br>5) | 0.027485 | 0.0499 | TP53     |
| regulation of pH (BP)                                                | GO:0006<br>885 | 1 gene | 1(45) | 18(2909<br>5) | 0.027485 | 0.0499 | ATP6V0A4 |
| negative regulation of<br>gene-specific transcription<br>(BP)        | GO:0032<br>582 | 1 gene | 1(45) | 18(2909<br>5) | 0.027485 | 0.0499 | RELA     |

**Supplementary Table S4C: Enrichment of KEGG pathway with HYPK-interacting proteins**

| <b>Annotations</b>                                                      | <b>Total number of proteins out of 29095</b> | <b>HYPK-Interacting Proteins out of 45 protein identified</b> | <b>Corrected hypergeometric p Value</b> |
|-------------------------------------------------------------------------|----------------------------------------------|---------------------------------------------------------------|-----------------------------------------|
| (KEGG) 00471:D-Glutamine and D-glutamate metabolism                     | 4                                            | GLUD1, GLUD2                                                  | 0.000329159                             |
| (KEGG) 04612:Antigen processing and presentation                        | 81                                           | HSP90AB1, CALR, HSPA8, PSME3                                  | 0.000357836                             |
| (KEGG) 05215:Prostate cancer                                            | 89                                           | RELA, HSP90AB1, TP53                                          | 0.00560475                              |
| (KEGG) 00910: Nitrogen metabolism                                       | 23                                           | GLUD1, GLUD2                                                  | 0.00681114                              |
| (KEGG) 04010: MAPK signaling pathway                                    | 265                                          | RELA, HSPB1, TP53, HSPA8                                      | 0.00702551                              |
| (KEGG) 00250:Alanine, aspartate and glutamate metabolism                | 31                                           | GLUD1, GLUD2                                                  | 0.00828026                              |
| (KEGG) 00330:Arginine and proline metabolism                            | 53                                           | GLUD1, GLUD2                                                  | 0.0205831                               |
| (KEGG) 04621: NOD-like receptor signaling pathway                       | 61                                           | RELA, HSP90AB1                                                | 0.0210941                               |
| (KEGG) 00010:Glycolysis / Gluconeogenesis                               | 59                                           | PGAM1, TPI1                                                   | 0.0222313                               |
| (KEGG) 05120:Epithelial cell signaling in Helicobacter pylori infection | 68                                           | RELA, ATP6V0A4                                                | 0.0234708                               |
| (KEGG) 05220:Chronic myeloid leukemia                                   | 75                                           | RELA, TP53                                                    | 0.0236635                               |
| (KEGG) 05212:Pancreatic cancer                                          | 72                                           | RELA, TP53                                                    | 0.0238474                               |
| (KEGG) 04210:Apoptosis                                                  | 87                                           | RELA, TP53                                                    | 0.0270246                               |
| (KEGG) 05222:Small cell lung cancer                                     | 84                                           | RELA, TP53                                                    | 0.0271993                               |
| (KEGG) 05200:Pathways in cancer                                         | 325                                          | RELA, HSP90AB1, TP53                                          | 0.0434377                               |
| (KEGG) 04722:Neurotrophin signaling pathway                             | 124                                          | RELA, TP53                                                    | 0.0464941                               |

**Supplementary Table S4D: Enrichment of specific 16 pathways in the Reactome database with 49 HYPK-interacting proteins**

| False discovery rate | Un-adjusted probability of seeing N or more genes in this Event by chance | Number of genes in your query which map to this Event | Total number of genes involved in this Event | Identifier of this Event | Name of this Event                                                  | Submitted identifiers mapping to this Event |
|----------------------|---------------------------------------------------------------------------|-------------------------------------------------------|----------------------------------------------|--------------------------|---------------------------------------------------------------------|---------------------------------------------|
| -                    | 1.64E-06                                                                  | 3                                                     | 6                                            | REACT_25267              | Association of AUF1 with Translation and Heat Shock Proteins        | HSPB1, HSPA8, HSPA1A                        |
| -                    | 9.72E-06                                                                  | 3                                                     | 10                                           | REACT_25315              | Ubiquitination of AUF1 (hnRNP D0)                                   | HSPB1, HSPA8, HSPA1A                        |
| -                    | 8.89E-05                                                                  | 4                                                     | 54                                           | REACT_25325              | Destabilization of mRNA by AUF1 (hnRNP D0)                          | HSPB1, HSPA8, PSME3, HSPA1A                 |
| -                    | 0.000542031                                                               | 4                                                     | 86                                           | REACT_24994              | Regulation of mRNA Stability by Proteins that Bind AU-rich Elements | HSPB1, HSPA8, PSME3, HSPA1A                 |
| -                    | 0.001669908                                                               | 4                                                     | 116                                          | REACT_20605              | Metabolism of mRNA                                                  | HSPB1, HSPA8, PSME3, HSPA1A                 |
| -                    | 0.002062672                                                               | 3                                                     | 57                                           | REACT_723                | Glucose metabolism                                                  | CALM1, PGAM1, TPI1                          |
| -                    | 0.00359101                                                                | 4                                                     | 143                                          | REACT_21257              | Metabolism of RNA                                                   | HSPB1, HSPA8, PSME3, HSPA1A                 |
| -                    | 0.004352608                                                               | 2                                                     | 22                                           | REACT_1383               | Glycolysis                                                          | PGAM1, TPI1                                 |
| -                    | 0.008546792                                                               | 2                                                     | 31                                           | REACT_1520               | Gluconeogenesis                                                     | PGAM1, TPI1                                 |
| -                    | 0.015009709                                                               | 3                                                     | 116                                          | REACT_474                | Metabolism of carbohydrates                                         | CALM1, PGAM1, TPI1                          |
| -                    | 0.022179905                                                               | 2                                                     | 51                                           | REACT_20549              | Autodegradation of the E3 ubiquitin ligase COP1                     | PSME3, TP53                                 |
| -                    | 0.022179905                                                               | 2                                                     | 51                                           | REACT_17044              | Muscle contraction                                                  | CALM1, VIM                                  |
| -                    | 0.023003856                                                               | 2                                                     | 52                                           | REACT_309                | Stabilization of p53                                                | PSME3, TP53                                 |
| -                    | 0.025551                                                                  | 2                                                     | 55                                           | REACT_1625               | p53-Dependent G1 DNA Damage Response                                | PSME3, TP53                                 |
| -                    | 0.025551                                                                  | 2                                                     | 55                                           | REACT_85                 | p53-Dependent G1/S DNA damage checkpoint                            | PSME3, TP53                                 |
| -                    | 0.028208563                                                               | 2                                                     | 58                                           | REACT_2254               | G1/S DNA Damage Checkpoints                                         | PSME3, TP53                                 |
