# Supplementary material for: Identification of HYPK-Interacting Proteins Reveals Involvement of HYPK in Regulating Cell Growth, Cell Cycle, Unfolded Protein Response and Cell Death
Source: PubMed Central journal article supplement (PMC3525516; doi:10.1371/journal.pone.0051415), 2012-12-10
Supplement: pone.0051415.s011.pdf [file pone.0051415.s011.pdf]

**Supplementary Table S5: HYPK interacting partners: sub-cellular localization and expression in brain**

|    | PROTEIN  | Localization                                                                                           | Expression in Brain |                |                |
|----|----------|--------------------------------------------------------------------------------------------------------|---------------------|----------------|----------------|
|    |          |                                                                                                        | neXtProt            | BioMart        | TiGER          |
|    | HYPK     | Cytoplasm                                                                                              | Not available*      | Not available* | YES            |
| 1  | HTT      | Cytoplasm, Nucleus                                                                                     | YES                 | YES            | YES            |
| 2  | ARCN1    | Golgi apparatus membrane, COPI-coated vesicle membrane                                                 | YES                 | YES            | YES            |
| 3  | EEF1A1   | Cytoplasm, Nucleus                                                                                     | YES                 | YES            | YES            |
| 4  | HSPA8    | Cytoplasm                                                                                              | UBIQUITOUS          | YES            | YES            |
| 5  | LMNB2    | Nucleus inner membrane, Nucleoplasmic side, Lipid-anchor                                               | YES                 | YES            | YES            |
| 6  | LBR      | Nucleus inner membrane                                                                                 | YES                 | YES            | YES            |
| 7  | TPI 1    | Nucleus                                                                                                | YES                 | YES            | YES            |
| 8  | SDCCAG1  | Nucleus                                                                                                | YES                 | Not available* | YES            |
| 9  | LENG8    | Not available*                                                                                         | YES                 | YES            | YES            |
| 10 | IKBIP    | Endoplasmic reticulum membrane                                                                         | YES                 | YES            | Not available* |
| 11 | CALM1    | Spindle pole, Cell membrane, Golgi apparatus                                                           | YES                 | YES            | YES            |
| 12 | CDH11    | Cell membrane                                                                                          | Not available*      | YES            | YES            |
| 13 | CALR     | Endoplasmic reticulum lumen, Cytosol, Extracellular matrix, Cell surface, Sarcoplasmic reticulum lumen | Not available*      | YES            | YES            |
| 14 | CEP290   | Centrosome, Nucleus                                                                                    | YES                 | YES            | YES            |
| 15 | ZNF462   | Nucleus                                                                                                | YES                 | YES            | YES            |
| 16 | ZNF100   | Nucleus                                                                                                | Not available*      | YES            | YES            |
| 17 | ZNF516   | Nucleus                                                                                                | Not available*      | Not available* | YES            |
| 18 | KIF20B   | Spindle, Nucleus                                                                                       | YES                 | NO**           | Not available* |
| 19 | HSP90AB1 | Cytoplasm                                                                                              | YES                 | YES            | YES            |
| 20 | MYOM3    | Not available*                                                                                         | Not available*      | Not available* | YES            |
| 21 | PGAM1    | Cytosol                                                                                                | Not available*      | Not available* | YES            |
| 22 | N4BP1    | Nucleolus (PML body)                                                                                   | Not available*      | YES            | YES            |
| 23 | ATP6V0A4 | Apical cell membrane                                                                                   | NO**                | Not available* | NO**           |
| 24 | GLUD1    | Mitochondrion matrix                                                                                   | YES                 | YES            | YES            |
| 25 | GLUD2    | Mitochondrion matrix                                                                                   | YES                 | YES            | YES            |
| 26 | SRRT     | Nucleoplasm, Cytoplasm                                                                                 | Not available*      | YES            | Not available* |
| 27 | PPP6R2   | Cytoplasm                                                                                              | NO**                | YES            | Not available* |
| 28 | NME2     | Cytoplasm, Nucleus                                                                                     | UBIQUITOUS          | Not available* | Not available* |
| 29 | VIM      | Cytoplasm, Cell                                                                                        | Not available*      | YES            | YES            |

|    |        |                                            |                |                |                |
|----|--------|--------------------------------------------|----------------|----------------|----------------|
|    |        | membrane, Golgi apparatus                  |                |                |                |
| 30 | HSF1   | Cytoplasm, Nucleus                         | YES            | Not available  | YES            |
| 31 | HSPA1A | Cytoplasm                                  | YES            | YES            | YES            |
| 32 | HSPB1  | Cytoplasm, Nucleus, Cell membrane, Spindle | NO**           | YES            | YES            |
| 33 | MLF1   | Cytoplasm, Nucleus                         | YES            | YES            | YES            |
| 34 | MLF2   | Cytoplasm, Nucleus                         | YES            | YES            | YES            |
| 35 | DNAJB3 | Not available*                             | Not available* | Not available* | YES            |
| 36 | RELA   | Nucleus, Cytoplasm                         | YES            | YES            | YES            |
| 37 | TP53   | ER, Nucleus (PML BODY), Cytoplasm          | Not available* | YES            | YES            |
| 38 | NAA10  | Cytoplasm, Nucleus                         | YES            | Not available* | Not available* |
| 39 | NAA15  | Cytoplasm, Nucleus                         | NO**           | YES            | Not available* |
| 40 | HSPA14 | Cytoplasm                                  | Not available* | YES            | YES            |
| 41 | DNAJC2 | Nucleus, cytoplasm                         | YES            | YES            | Not available* |
| 42 | CHD3   | Nucleus, Cytoplasm (centrosome)            | Not available  | YES            | YES            |
| 43 | GC     | Secreted                                   | NO**           | NO**           | NO**           |
| 44 | MDFI   | Nucleus, Cytoplasm                         | Not available* | YES            | Not available* |
| 45 | PSME3  | Nucleus, Cytoplasm                         | YES            | YES            | YES            |
| 46 | QKI    | Nucleus, Cytoplasm                         | YES            | YES            | YES            |
| 47 | RBPM5  | Nucleus, Cytoplasm                         | Not available* | YES            | Not available* |
| 48 | RHOXF2 | Nucleus                                    | NO**           | NO**           | Not available* |
| 49 | TH1L   | Nucleus                                    | Not available* | YES            | Not available* |

‘\*’ **Not available:** No information (regarding the sub-cellular localization/expression in brain) was retrieved about the gene/protein from the concerned database

‘\*\*’ **No:** This gene/protein does not express in brain
