# Supplementary material for: Identification of HYPK-Interacting Proteins Reveals Involvement of HYPK in Regulating Cell Growth, Cell Cycle, Unfolded Protein Response and Cell Death
Source: PubMed Central journal article supplement (PMC3525516; doi:10.1371/journal.pone.0051415), 2012-12-10
Supplement: pone.0051415.s012.pdf [file pone.0051415.s012.pdf]

**Supplementary Table S6: Mean values and standard deviations for growth curve calculation of Neuro2A and *STHdh*<sup>Q7</sup>/*Hdh*<sup>Q7</sup> cells with and without HYPK**

**A:**

|        | <i>STHdh</i> <sup>Q7</sup> / <i>Hdh</i> <sup>Q7</sup><br>U61+DsRed | <i>STHdh</i> <sup>Q7</sup> / <i>Hdh</i> <sup>Q7</sup><br>HYPK U61+DsRed | <i>STHdh</i> <sup>Q7</sup> / <i>Hdh</i> <sup>Q7</sup> HYPK<br>U61+HYPK-DsRed | <i>STHdh</i> <sup>Q7</sup> / <i>Hdh</i> <sup>Q7</sup> HYPK<br>U61+HSPA8-DsRed |
|--------|--------------------------------------------------------------------|-------------------------------------------------------------------------|------------------------------------------------------------------------------|-------------------------------------------------------------------------------|
| 0 hr   | 100000                                                             | 100000                                                                  | 100000                                                                       | 100000                                                                        |
| 24 hr  | 163333±4507                                                        | 116666±1937                                                             | 143333±1875                                                                  | 170000±1421                                                                   |
| 48 hr  | 303333±6866                                                        | 220000±2457                                                             | 300000±2045                                                                  | 276666±3457                                                                   |
| 72 hr  | 590000±6383                                                        | 276666±2078                                                             | 596666±4199                                                                  | 670000±2218                                                                   |
| 96 hr  | 1066667±26826                                                      | 430000±5931                                                             | 1100000±7845                                                                 | 1133333±4126                                                                  |
| 120 hr | 1666667±12458                                                      | 880000±6432                                                             | 1900000±6241                                                                 | 1800000±5641                                                                  |

**B:**

|       | Neuro2A<br>U61+DsRed | Neuro2A HYPK<br>U61+DsRed | Neuro2A HYPK U61+HYPK-<br>DsRed | Neuro2A HYPK U61+HSPA8-<br>DsRed |
|-------|----------------------|---------------------------|---------------------------------|----------------------------------|
| 0 hr  | 100000               | 100000                    | 100000                          | 100000                           |
| 24 hr | 140000±3426          | 120000±3647               | 130000±4843                     | 145000±5405                      |
| 48 hr | 250000±5021          | 180000±4201               | 240000±3498                     | 260000±2178                      |
| 72 hr | 400000±5689          | 250000±9472               | 370000±4708                     | 420000±4294                      |
| 96 hr | 750000±6457          | 450000±4986               | 720000±8762                     | 780000±5486                      |
